# Supplementary material for: Bi2S3/ZnS heterostructures for H2S sensing in the dark: the synergy of increased surface-adsorbed oxygen and charge transfer
Source: Royal Society of Chemistry journal article supplement (doi:10.1039/d2qi01378a), 2022-01-01
Supplement: d2qi01378a1.pdf [file d2qi01378a1.pdf]

## Supporting Information

### **Bi<sub>2</sub>S<sub>3</sub>/ZnS heterostructures for dark-assisted H<sub>2</sub>S sensing: synergy of increased surface-adsorbed oxygen and charge transfer**

Jiaying Liu<sup>a</sup>, Tiezhu Xin<sup>a\*</sup>, Zizhen Yang<sup>a</sup>, Weixun Hao<sup>b</sup>, You Wang<sup>a,c</sup> and Juanyuan Hao<sup>a,c\*</sup>

<sup>a</sup> School of Materials Science and Engineering, Harbin Institute of Technology, Harbin 150001, P. R. China. E-mail: jyhao@hit.edu.cn and tiezhu-x@hit.edu.cn.

<sup>b</sup> State Key Laboratory of Efficient and Clean Coal-fired Utility Boilers, Harbin Boiler Company Limited, Harbin 150046, P.R. China.

<sup>c</sup> Key Laboratory of Micro-Systems and Micro-Structures Manufacturing, Ministry of Education, Harbin 150001, P.R. China.

## Experimental section

### *Synthesis of $\text{Bi}_2\text{S}_3$*

$\text{Bi}_2\text{S}_3$  was synthesized by an easy solvothermal. Typically, 1 mmol  $\text{Bi}(\text{NO}_3)_3 \cdot 5\text{H}_2\text{O}$  and 2 mmol  $\text{Na}_2\text{S} \cdot 9\text{H}_2\text{O}$  were dissolved in 15 mL EG, respectively.  $\text{Na}_2\text{S} \cdot 9\text{H}_2\text{O}$  solution was added slowly in drops into  $\text{Bi}(\text{NO}_3)_3 \cdot 5\text{H}_2\text{O}$  solution and stirred continuously for 1 hour. The resulting mixture was then transferred to 50 mL of Teflon-lined stainless-steel autoclaves and heated at 180 °C for 12 hours. After the reaction was completed and cooled down naturally, the black solid product was collected and washed several times with ultra-pure water and anhydrous ethanol, then dried at 60 °C for 5 hours.

### *Synthesis of $\text{Bi}_2\text{S}_3/\text{ZnS}$ heterostructures*

$\text{Bi}_2\text{S}_3/\text{ZnS}$  heterostructures were synthesized by as-prepared  $\text{Bi}_2\text{S}_3$  through a secondary solvothermal method. The specific process was as follows: firstly, 0.1 mmol  $\text{Bi}_2\text{S}_3$  was dissolved in 10 mL EG and stirred for 30 minutes. Then, 10 mL  $\text{Zn}(\text{NO}_3)_2 \cdot 6\text{H}_2\text{O}/\text{EG}$  and 10 mL  $\text{Na}_2\text{S} \cdot 9\text{H}_2\text{O}/\text{EG}$  solutions were added to the above suspension separately followed by magnetic stirring for 30 minutes, in which the molar ratio of zinc and sulfur was 1:1. The mixed solution was then transferred to Teflon-lined stainless-steel autoclaves (50 mL) and reacted at 180 °C for 12 hours. Finally, the obtained precipitate was centrifuged and dried. To further optimize the properties of the composites,  $\text{Bi}_2\text{S}_3/\text{ZnS}$  heterostructures with different contents were prepared by modulating the added amount of zinc and sulfur source. For convenience, the samples were labelled as  $\text{Bi}_2\text{S}_3/\text{ZnS}$ -1,  $\text{Bi}_2\text{S}_3/\text{ZnS}$ -3,  $\text{Bi}_2\text{S}_3/\text{ZnS}$ -5,  $\text{Bi}_2\text{S}_3/\text{ZnS}$ -10, corresponding to the molar of zinc source (0.001 mmol, 0.003 mmol, 0.005 mmol, 0.010 mmol, respectively).

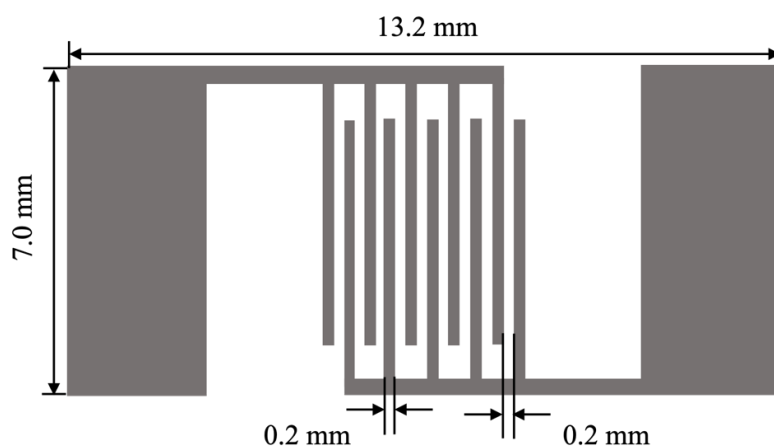

Fig. S1 Schematic diagram of the Ag-Pd interdigital electrode.

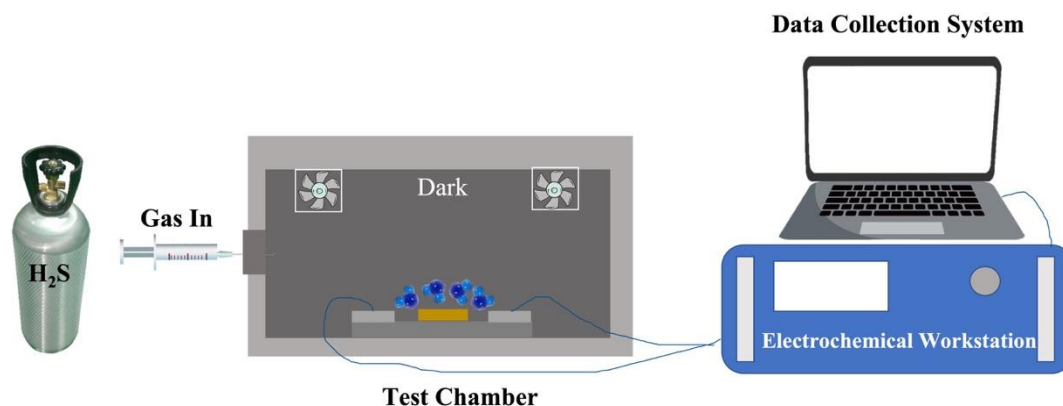

Fig. S2 Schematic diagram of the sensor measurement.

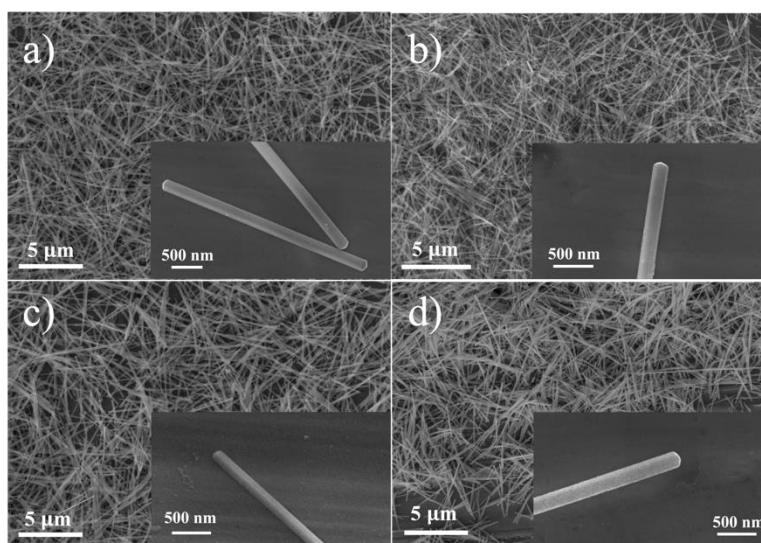

**Fig. S3** SEM images of (a)  $\text{Bi}_2\text{S}_3$ ; (b)  $\text{Bi}_2\text{S}_3/\text{ZnS-1}$ ; (c)  $\text{Bi}_2\text{S}_3/\text{ZnS-5}$ ; (d)  $\text{Bi}_2\text{S}_3/\text{ZnS-10}$ .

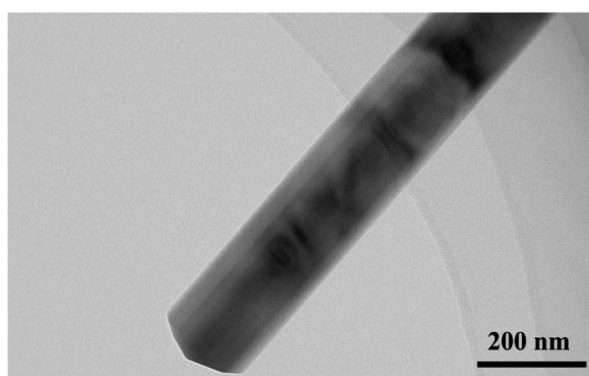

**Fig. S4** TEM image of  $\text{Bi}_2\text{S}_3$ .

**Table S1** The atomic percentage of the elements in the EDS mapping of  $\text{Bi}_2\text{S}_3/\text{ZnS-3}$  sample.

| Elements | Atomic Percentage (%) |
|----------|-----------------------|
| S        | 64.61                 |
| Zn       | 0                     |
| Bi       | 35.39                 |

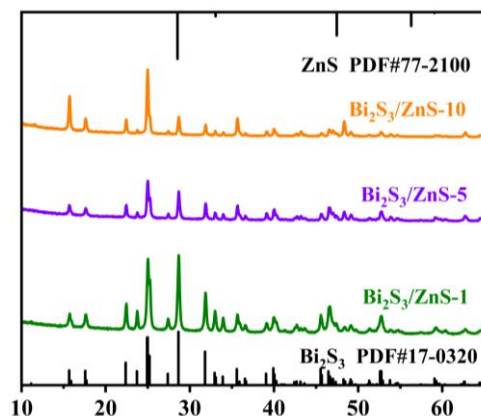

Fig. S5 XRD patterns of Bi<sub>2</sub>S<sub>3</sub>/ZnS-1, Bi<sub>2</sub>S<sub>3</sub>/ZnS-5, and Bi<sub>2</sub>S<sub>3</sub>/ZnS-10.

Table S2 The atomic percentage of the elements in the XPS results of Bi<sub>2</sub>S<sub>3</sub>/ZnS-3 sample.

| Elements | Atomic Percentage (%) |
|----------|-----------------------|
| C        | 20.12                 |
| O        | 5.79                  |
| Bi       | 7.90                  |
| Zn       | 7.40                  |
| S        | 58.79                 |

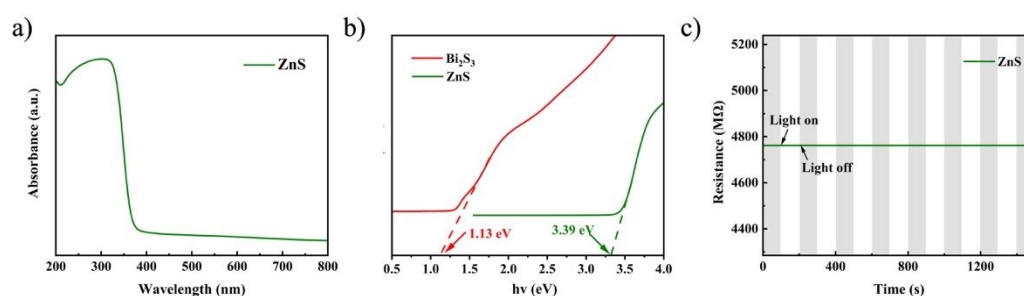

Fig. S6 (a) UV-vis DRS of ZnS. (b) The plot of  $(\alpha h\nu)^2$  vs photo energy ( $h\nu$ ) for Bi<sub>2</sub>S<sub>3</sub> and ZnS. (c) The unchanged resistance of ZnS tested by periodically turning on and off 160 mW/cm<sup>2</sup> white light source for seven cycles.

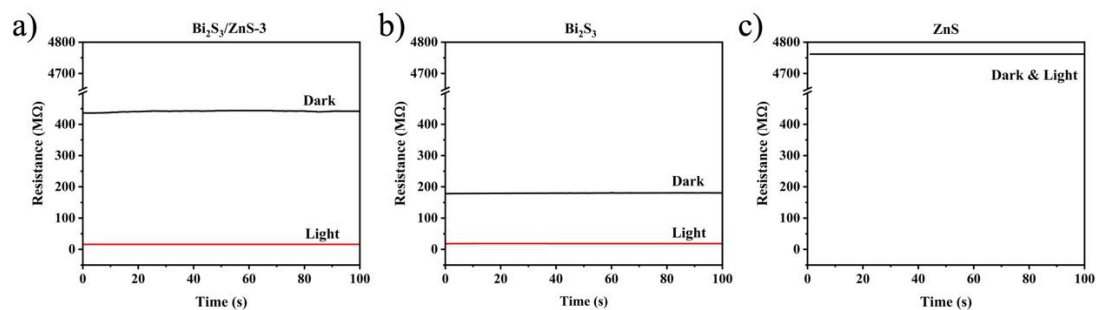

Fig. S7 The baseline curves of devices based on (a) Bi<sub>2</sub>S<sub>3</sub>/ZnS-3, (b) Bi<sub>2</sub>S<sub>3</sub> and (c) ZnS before and after light irradiation.

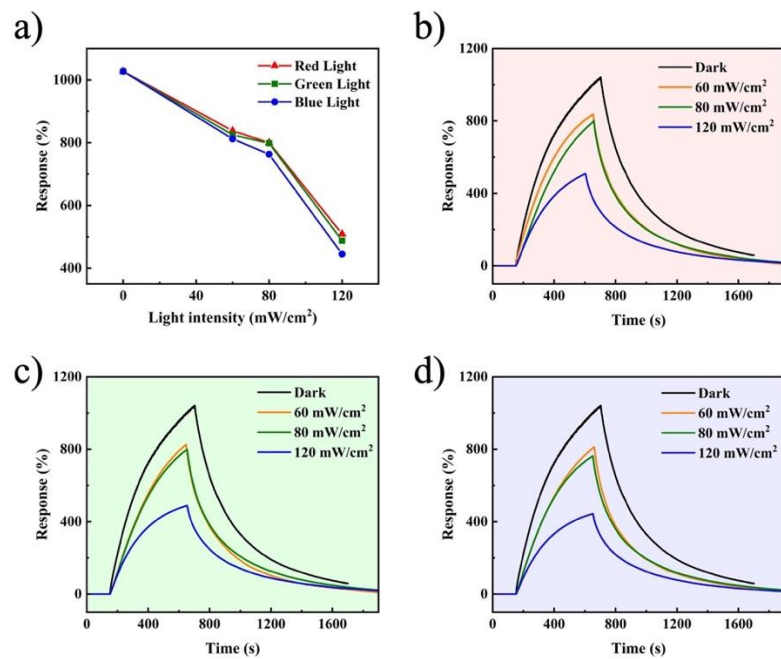

**Fig. S8** (a) Summarized sensing responses of Bi<sub>2</sub>S<sub>3</sub>/ZnS-3 sensor to 500 ppb H<sub>2</sub>S in dark and under different light illumination. Response and recovery curves based on Bi<sub>2</sub>S<sub>3</sub>/ZnS-3 sensor toward 0.5 ppm H<sub>2</sub>S under different (b) red, (c) green, and (d) blue light intensity.

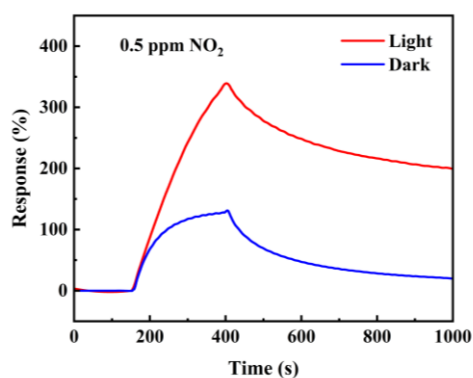

**Fig. S9** Comparison of Bi<sub>2</sub>S<sub>3</sub>/ZnS-3 sensor to 500 ppb NO<sub>2</sub> under light and in dark.

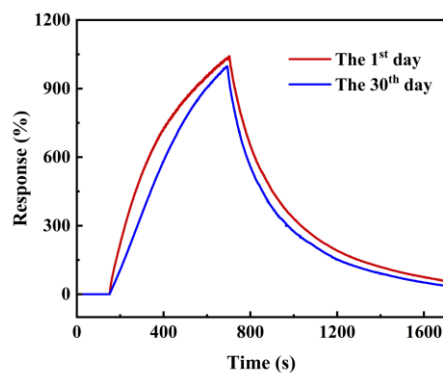

**Fig. S10** Comparison of response curves to 500 ppb H<sub>2</sub>S in dark on 1<sup>st</sup> and 30<sup>th</sup> day.

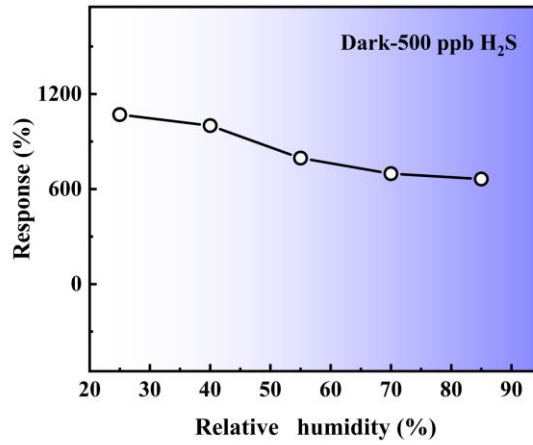

Fig. S11 The sensing response of Bi<sub>2</sub>S<sub>3</sub>/ZnS-3-based sensor toward 500 ppb H<sub>2</sub>S in different relative humidity in dark.

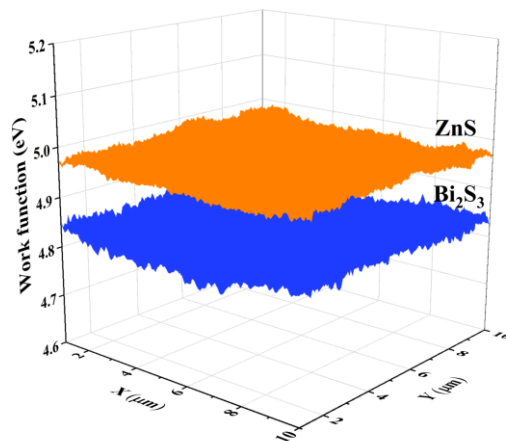

Fig. S12 Work functions of Bi<sub>2</sub>S<sub>3</sub> and ZnS measured by KPFM.

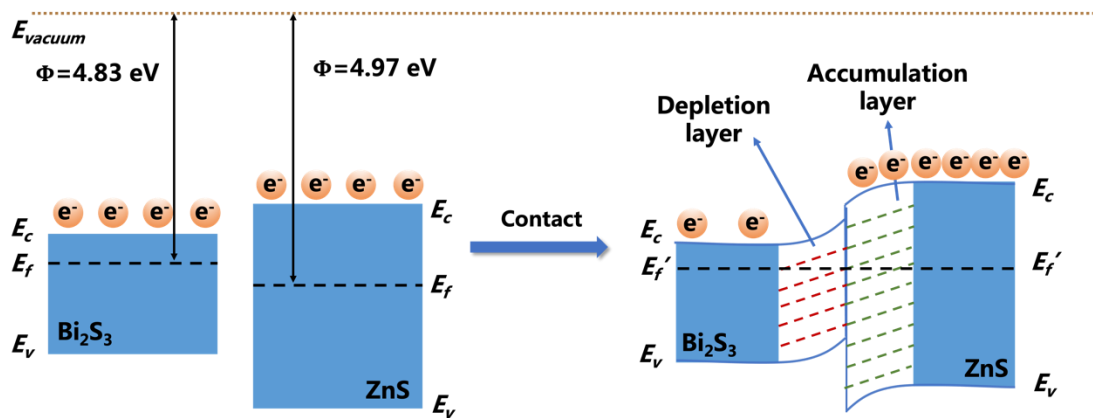

Fig. S13 The energy band diagram of the Bi<sub>2</sub>S<sub>3</sub>/ZnS heterostructure before and after equilibrium.

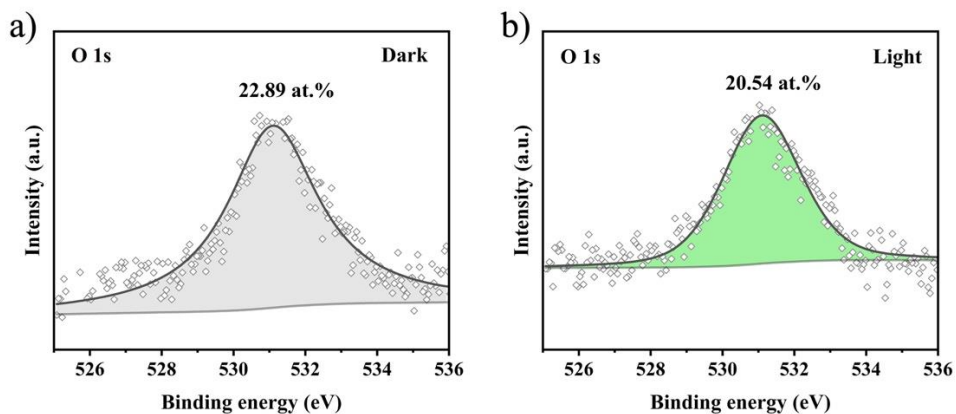

**Fig. S14** The in-situ O 1s XPS spectra of Bi<sub>2</sub>S<sub>3</sub>/ZnS heterostructures: (a) in dark and (b) under green light illumination.

The in-situ XPS test was performed on the ESCLAB 250 Xi instrument. Firstly, the chemical state of the sample was recorded under dark conditions, maintaining a stable test environment during the whole process. Then, green light was irradiated on the sample surface through the observation window, simultaneously the chemical state of the sample surface under light condition was measured. At last, the variation of O<sub>2</sub><sup>-</sup> contents adsorbed on material surface under dark and light conditions was analyzed.

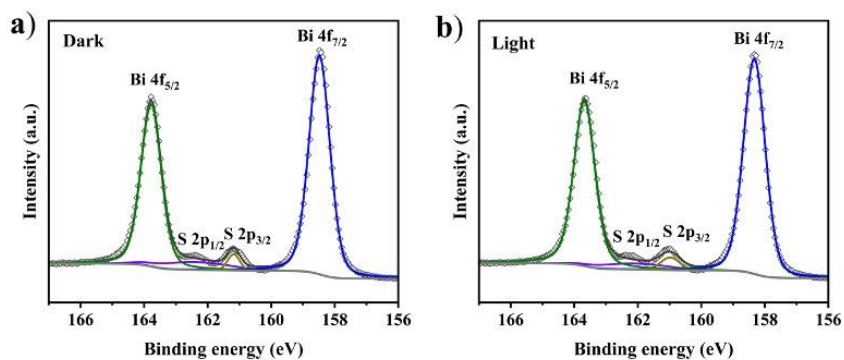

**Fig. S15** The Bi 4f XPS spectra of Bi<sub>2</sub>S<sub>3</sub>/ZnS-3 (a) in dark and (b) under light illumination.

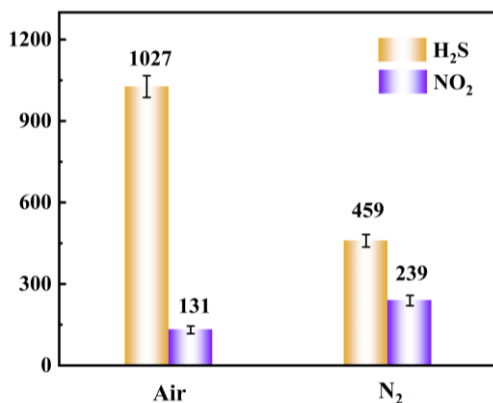

**Fig. S16** The sensing response of Bi<sub>2</sub>S<sub>3</sub>/ZnS-3 to 500 ppb H<sub>2</sub>S and NO<sub>2</sub> in different test condition: Air and N<sub>2</sub> as the background gases in dark.
